# Supplementary material for: Pseudomonas PS01 Isolated from Maize Rhizosphere Alters Root System Architecture and Promotes Plant Growth
Source: PubMed Central journal article supplement (PMC7232511; doi:10.3390/microorganisms8040471), 2020-03-26
Supplement: microorganisms-08-00471-s001.pdf [file microorganisms-08-00471-s001.pdf]

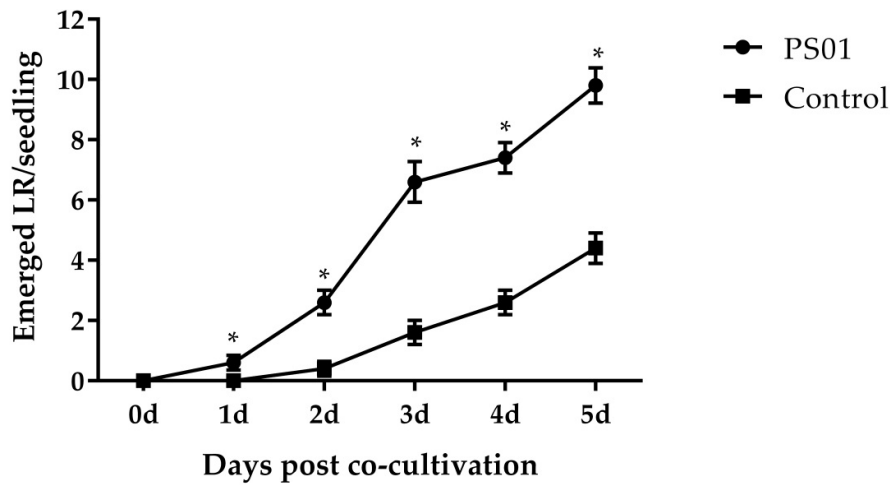

**Figure S1 a. Time course of LR initiation in response to PS01.** At time point 0 d, bacteria were inoculated on the plates. The values represent means  $\pm$  SD ( $n = 15$ ). Asterisks indicate statistically significant differences compared with untreated roots (Student's t test;  $p < 0.05$ ).

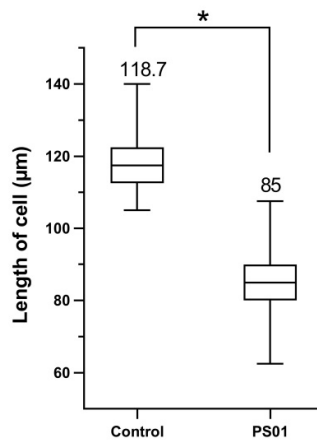

**Figure S1 b. Inhibition of root cell elongation in differentiation zone by PS01.** Length of cells were observed and measured under a 40 X microscope. Bars represent average lengths  $\pm$  SD of 75 cells in each developmental zone ( $n = 15$ ). Asterisks indicate statistically significant differences compared with non-inoculated roots (Student's t test;  $p < 0.05$ ).

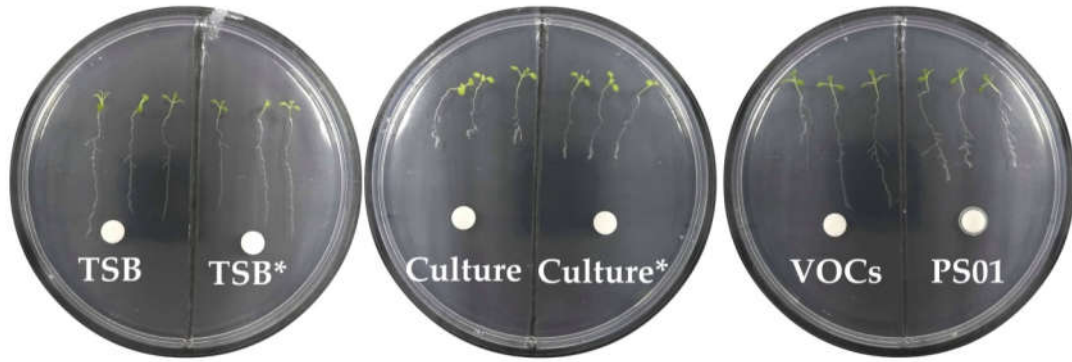

(a)

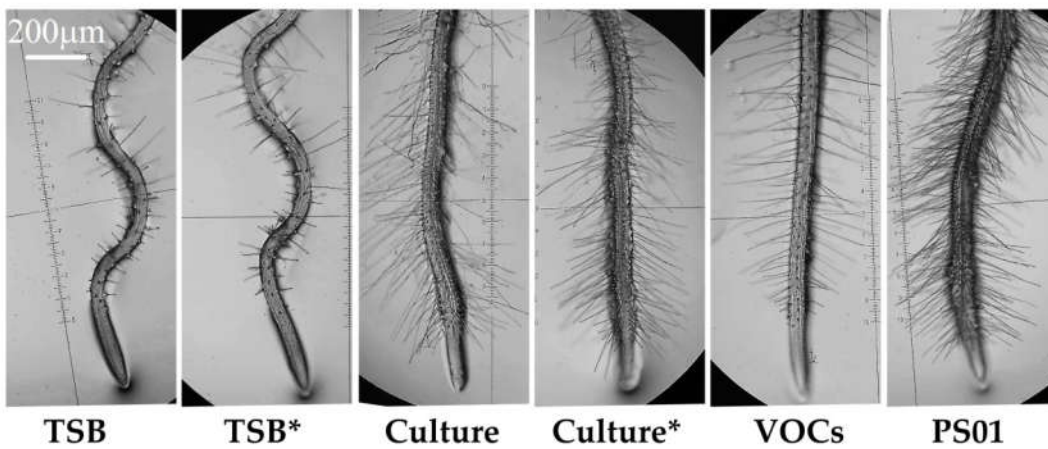

(b)

**Figure S2. Different secreted metabolites produced by PS01 implicated in RSA of *Arabidopsis*.** (a) Split plate assay; (b) Effect of VOCs blend and diffusible compounds on RH development. Photos were taken after 7 days of inoculation.

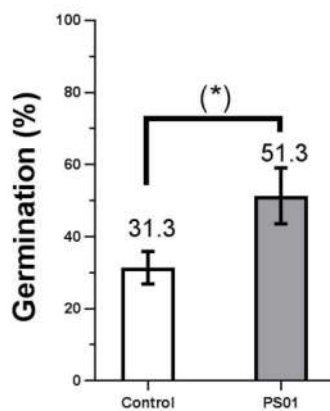

**Figure S3. *Pseudomonas* PS01 improves germination rate in *Zea mays*.** The germination rate was evaluated after 2 days incubation (100 seeds). Bars represent average values ( $n = 3$ ). Asterisks indicate statistically significant differences compared with non-inoculated roots (Student's  $t$  test;  $p < 0.05$ )

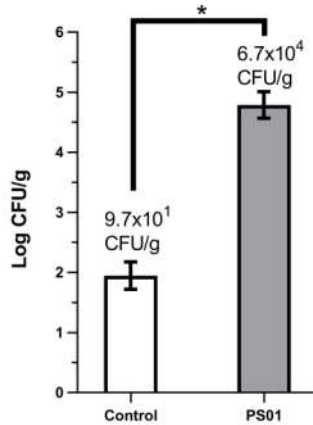

**Figure S4. Root colonization of maize plants by PS01.** The number of *Pseudomonas* sp. per gram of root was determined at 30 th day. Bars represent average of log CFU g<sup>-1</sup> ± SD (*n* = 15). Asterisks indicate statistically significant differences compared with non-inoculated roots (Student's *t* test; *p* < 0.05)

**Table S1. Accession number, name, description, and primer sequences used for quantitative RT-PCR [43]**

| AGI Code | Name      | Description                                                                                                | Fw/Rv primers                                                      |
|----------|-----------|------------------------------------------------------------------------------------------------------------|--------------------------------------------------------------------|
| At3      | AIR12     | Auxin-responsive protein                                                                                   | 5'-TGAATCAGGTATGGCAGATCGG-3'(F)<br>5'-TGAAACTCAACACACCGTGGG-3'(R)  |
| g07390   | DFL1      | IAA-amido synthase that conjugates Ala, Asp, Phe, and Trp to auxin                                         | 5'-CACAAAGATCGCAGCTTTG-3'(F)<br>5'-ATCATCTGCGTTTCGTGTCAC-3'(R)     |
| At1      | NAC1      | Transcription factor involved in shoot apical meristem formation and auxin mediated Lateral root formation | 5'-GCCTCCGGGATTTCAGATTCA-3'(F)<br>5'-TCAGGACAAGAGGTGGTCGATG-3'(R)  |
| g56010   | AUX1      | Auxin permease                                                                                             | 5'-AAGGGCTTTGGCTAGATTGCC-3'(F)<br>5'-CAAGAAGAGCACCACAGCG-3'(R)     |
| At2      | IAA3/SHY2 | Regulates multiple auxin responses in roots, induced by IAA                                                | 5'-GCCAAAGGTTTAGGCTGTGTG-3'(F)<br>5'-TAGATCTTGCCCGAGAAACCCG-3'(R)  |
| g38120   | PIN1      | Auxin efflux carrier involved in shoot and root development                                                | 5'-CGCTTCAGAGTTCAGAAACCC-3'(F)<br>5'-CACAGCTTCTCCAGGACCAAAG-3'(R)  |
| At1      | PIN2/EIR1 | Auxin efflux carrier                                                                                       | 5'-CCAATGTTACGGGGTCAACG-3'(F)<br>5'-GAAGCACTCGAACTCCACACG-3'(R)    |
| g73590   | AAO1      | Arabidopsis aldehyde oxidase 1 with the specificity for indole-3-acetaldehyde                              | 5'-TGTGGCGAAGGTGGTTGTGG-3'(F)<br>5'-GCTGCGAGGAGGTGGATGAG-3'(R)     |
| At5      | ASA1      | Anthranilate synthase alpha subunit 1                                                                      | 5'-GCGTTGGTCGTTATAGCGTTG-3'(F)<br>5'-TGGGATCTCCATTGGATCTTCG-3'(R)  |
| g57090   | TSA1      | Tryptophan synthase alpha chain                                                                            | 5'-CGTTGGAGAGGGGAACAAC-3'(F)<br>5'-TTGGTGTGGTTGGTGTAGTGAG-3'(R)    |
| At3      | YUCCA5    | Flavin mono-oxygenase                                                                                      | 5'-TGTGTCCAGTCTGCTCGATACG-3'(F)<br>5'-CCCCTGCCACCACCTAACC-3'(R)    |
| g20960   | CYP79 B2  | Cytochrome P450 that is involved in tryptophan metabolism                                                  | 5'-CCATGCAGAGACAACAGAAACC-3'(F)<br>5'-AGGTGCTAAAGGACGATGTTTC-3'(R) |
| At4      | CYP83 B1  | Cytochrome P450 mono-oxygenase 83 B1                                                                       | 5'-ACGAGACGCAAGCACITTTGG-3'(F)<br>5'-GGGCGTTAGGGTCAAGAGTC-3'(R)    |
| g31500   | IGPS      | Indole-3-glycerol-phosphate synthase                                                                       | 5'-GGACATTTGAGTTGAGATTGC-3'(F)<br>5'-CCTAAGAGCCCCAACAAAATCC-3'(R)  |
| At2      |           |                                                                                                            |                                                                    |
| g04400   |           |                                                                                                            |                                                                    |

**Table S2. Gene annotations of PS01 genome related to its IAA- and VOCs-producing ability.**

| Trait                        | Contig ID | Peptide ID               | Gene annotation                            | KO/gene ID | KEGG gene name | EC number |
|------------------------------|-----------|--------------------------|--------------------------------------------|------------|----------------|-----------|
| IAA biosynthesis TAM pathway | NODE_382  | fig 286.823.pcg.23<br>19 | Tryptophan decarboxylase                   | K01593     | DDC, TDC       | 4.1.1.28  |
|                              | NODE_30   | fig 286.823.pcg.19<br>39 | monoamine oxidase                          | k00274     | MAO, aofH      | 1.4.3.4   |
|                              | NODE_446  | fig 286.823.pcg.28<br>40 | aldehyde dehydrogenase (NAD <sup>+</sup> ) | K00128     | ALDH           | 1.2.1.3   |
| IAA biosynthesis IAM pathway | NODE_157  | fig 286.823.pcg.42<br>9  | Tryptophan 2-monooxygenase                 | K00466     | iaaM           | 1.13.12.3 |
|                              | NODE_16   | fig 286.823.pcg.69<br>3  | amidase                                    | K01426     | amiE           | 3.5.1.4   |
|                              | NODE_382  | fig 286.823.pcg.21<br>79 | amidase                                    | K01426     | amiE           | 3.5.1.4   |

|                   |          |                      |                                                                                     |        |                  |                      |
|-------------------|----------|----------------------|-------------------------------------------------------------------------------------|--------|------------------|----------------------|
| (R)-2-Acetoin     | NODE_101 | fig 286.823.peg.62   | acetolactate synthase I/II/III large subunit                                        | K01652 | ilvB, ilvG, ilvI | 2.2.1.6              |
|                   | NODE_152 | fig 286.823.peg.367  | acetolactate synthase I/II/III large subunit                                        | K01652 | ilvB, ilvG, ilvI | 2.2.1.6              |
|                   | NODE_293 | fig 286.823.peg.1591 | acetolactate synthase I/II/III large subunit                                        | K01652 | ilvB, ilvG, ilvI | 2.2.1.6              |
|                   | NODE_76  | fig 286.823.peg.3854 | acetolactate synthase I/II/III large subunit                                        | K01652 | ilvB, ilvG, ilvI | 2.2.1.6              |
|                   | NODE_76  | fig 286.823.peg.3855 | acetolactate synthase I/III small subunit                                           | K01653 | ilvH, ilvN       | 2.2.1.6              |
|                   | NODE_209 | fig 286.823.peg.1000 | (R,R)-butanediol dehydrogenase / meso-butanediol dehydrogenase / diacetyl reductase | K00004 | BDH, butB        | 1.1.1.-              |
| 2,3-butanediol    | NODE_209 | fig 286.823.peg.1000 | (R,R)-butanediol dehydrogenase / meso-butanediol dehydrogenase / diacetyl reductase | K00004 | BDH, butB        | 1.1.1.-              |
|                   |          |                      |                                                                                     |        |                  | 1.1.1.4<br>1.1.1.303 |
| 4-hydroxybenzoate | NODE_446 | fig 286.823.peg.2897 | chorismate-pyruvate lyase                                                           | K03181 | ubiC             | 4.1.3.40             |
